# Supplementary material for: Reduction of forest soil respiration in response to nitrogen deposition
Source: Springer Nature journal article supplement (doi:10.1038/ngeo844), 2010-04-25
Supplement: 41561_2010_BFngeo844_MOESM166_ESM.pdf [file 41561_2010_BFngeo844_MOESM166_ESM.pdf]

## 1. Methods and material

### 1.1 Meta-analyses of manipulation experiments

#### *Data acquisition*

We searched for replicated N addition experiments on forest ecosystems, where responses of soil carbon pools or fluxes were reported. Most of the data included in the analysis were extracted from figures and tables in published papers, although some data were not published in peer reviewed literature and were obtained via personal communication. We collected data on total biomass (TB), litterfall (LF), fine root production (FRP), root respiration (Rr), microbial biomass (Cmic), microbial respiration (Rh), litter decomposition rates (LD), soil CO<sub>2</sub> efflux (SCE) and soil C content, resulting in 255 entries for the meta-analysis originating from 57 manipulation experiments (see Appendix S1). When several years of data were reported, we calculated the weighted mean, using the reciprocal of the measurement variance.

We only included studies performed in woody systems, where nitrogen (N) was added as a fertilization treatment. Several studies used different species in the same experiment or included other manipulations, e.g. elevated CO<sub>2</sub>, ozone, different soils. Results from different treatments, plant species, soils, or measurement protocols within the same experiment were considered independent measurements. General site information, source references and sampling methods are described in Appendix S2.

*Meta-analysis*

Data were analyzed with meta-analytical techniques using MetaWin 2.1 software <sup>1</sup>. In conventional meta-analysis, each individual observation is weighted by the reciprocal of the mixed-model variance <sup>2</sup>. We used standard deviation (SD) values reported in the individual studies, or calculated the SD from the standard error and the number of replicates. Studies that did not report standard error or deviation were not included in the database. The natural log of the response ratio ( $r = \text{response in treatment plots} / \text{response in untreated plots}$ ) was used as metric in the analyses, and is reported as the percentage change in elevated CO<sub>2</sub> and/or temperature. The use of the natural logarithm instead of the Hedges d-index has the advantage of linearizing the metric, thereby being less sensitive to changes in a small control group.

A mixed model was used to assess the overall treatment effects on the different C pools and fluxes. Similarly, we tested our dataset for differences between additional treatments, types and amount of N fertilizer and tree seasonal strategy (evergreen vs deciduous).

If the number of studies used to calculate a mean and confidence interval (CI) is lower than 20, the CI can be too narrow <sup>2</sup>. Therefore, we used the CI based on resampling methods for the assessment of statistical differences (2500 iterations). Confidence limits based on bootstrapping tests are wider than standard confidence limits, implying that resampling estimates are more conservative <sup>3</sup>. If the calculated 95% confidence interval did not overlap with zero, then a significant elevated CO<sub>2</sub> and/or warming response was considered. Significant differences between groups (=categorical analyses for treatment comparison, different tree seasonal strategies and type and amount of fertilizer) were identified on the basis of the within and between group heterogeneity. Significant differences are reported at  $P < 0.05$ .

## 1.2 Analysis of field sites

### *Data acquisition*

To assess the contributions of changes in Rh and SCE to NPP, we conducted a literature and database search<sup>4</sup> to determine the fate of the C sequestered under different N-deposition levels. Observation-based estimates were compiled for C cycle components, including NPP, SCE and Rh. Observed and modelled estimates of wet, dry and total N-deposition were derived from published datasets<sup>5-7</sup>. An arbitrary threshold of  $0.55 \text{ g N m}^{-2} \text{ a}^{-1}$  from wet deposition was used to separate a low from a high deposition group. However, the conclusions of this study hold for wet deposition thresholds ranging from  $0.55$  up to  $1.0 \text{ g N m}^{-2} \text{ a}^{-1}$ . We used wet rather than total deposition because the estimates for dry deposition are based on a limited set of observations and questionable assumptions, resulting in large uncertainties<sup>5,6</sup>.

Although a wide range of management practices is applied globally, all of them share one key characteristic: woody biomass is exported from the site. Among sites, information on management was of variable quality and detail. Therefore, a coarse classification was used to distinguish between managed and unmanaged sites. We excluded all sites that were recently disturbed, fertilized, irrigated or for which no management information was available. Nevertheless, better data allowing refined management classifications is likely to result in more detailed understanding of the management effect on C-cycling and its interactions with N-deposition.

### *Uncertainties*

Uncertainties of flux estimates are rarely reported in the literature, although measurement errors or gapfilling uncertainties have been sometimes addressed<sup>8-11</sup> (typically ~15-20%).

Therefore, we estimated the total uncertainty for every flux quantity contained in the data set using a consistent framework based on expert judgment<sup>12</sup>. This framework was designed to account for differences in data quality between sites due to length of time series, methodology and conceptual difficulties (i.e. separation of autotrophic and heterotrophic respiration, etc.). Subsequently, uncertainties were fully accounted for in the statistical analyses by means of 1000 simulations based on Monte Carlo principles<sup>13</sup>. Within each of the 1000 Monte Carlo simulations performed, normally distributed random errors, based on the uncertainty framework of the database, were added to the observed fluxes. Therefore, all results that are based on flux data are reported as the median value and the 68% confidence interval of the probability distribution ( $\pm$  standard deviation).

#### *Statistical analysis*

We used a maximum likelihood estimator (MLE) to estimate the parameters of a linear relationship between NPP and Rh. The MLE accounts for uncertainties in both NPP and Rh when estimating the parameters of the relationship.

## 2. Tables

**Table S1:** Meta-analysis results of the effect of N addition on soil C inputs and soil C fluxes. n indicates the number of experiments upon which the result is based; the column marked “% Effect” shows the percentage change in the parameter in the fertilized - relative to the unfertilized treatment; columns “Lower limit” and “Upper limit” give the bootstrapped 95% confidence interval.

| Parameter                   | n  | % Effect | Lower limit | Upper Limit |
|-----------------------------|----|----------|-------------|-------------|
| Litterfall                  | 16 | 1        | -12         | 13          |
| Fine root production        | 9  | -6       | -19         | 5           |
| Total biomass               | 24 | 36       | 17          | 56          |
| Microbial biomass           | 34 | -11      | -20         | -2          |
| Soil C content              | 41 | 10       | 4           | 17          |
| Litter decomposition        | 20 | -3       | -8          | 1           |
| Heterotrophic respiration   | 36 | -15      | -25         | -5          |
| Root respiration            | 17 | -21      | -34         | -8          |
| Soil CO <sub>2</sub> efflux | 57 | -10      | -17         | -4          |

3. Appendices

3.1. Appendix 1: Site information and data used in meta-analysis of manipulation experiments

1: Site names, experimental species, location of the site, age of the tree stand

| Site Name                         | Treatments                          | Species                                                                                                                                     | Latitude | Longitude | Age                  |
|-----------------------------------|-------------------------------------|---------------------------------------------------------------------------------------------------------------------------------------------|----------|-----------|----------------------|
| Aber forest                       | Fertilization                       | <i>Picea sitchensis</i>                                                                                                                     | 53.2 N   | 4 W       | 30                   |
| Barro Colorado Nature Monument    | Fertilization                       | Tropical forest                                                                                                                             | 9.12 N   | 79.85 W   | >300                 |
| Bear Brooks Watershed             | Fertilization                       | <i>Betula alleghaniensis</i> , <i>Fagus grandifolia</i> ,<br><i>Picea rubra</i>                                                             | 44.87 N  | 8.01 W    | >50                  |
| Birmensdorf                       | CO <sub>2</sub> xFertilizationxSoil | <i>Picea abies</i> , <i>Fagus sylvatica</i>                                                                                                 | 47.35 N  | 8.43 E    | 2                    |
| Boulder                           | Fertilization                       | <i>Pinus resinosa</i>                                                                                                                       | 46.17 N  | 89.67 W   | 31                   |
| Central Alaska                    | Fertilization                       | <i>Picea mariana</i>                                                                                                                        | 63.92 N  | 145.73 W  | 80                   |
| Cedar Creek                       | Fertilization                       | <i>Populus grandidentata</i> , <i>Acer saccharum</i> ,<br><i>Tilia americana</i> , <i>Quercus ellipsoidalis</i> ,<br><i>Pinus strobus</i> , | 45.4 N   | 93.2 W    | ? (not young stands) |
| Dinghushan Biosphere Reserve      | Fertilization                       | Subtropical pine and mixed forest                                                                                                           | 23.17 N  | 112.17 E  | 70                   |
| Dossi                             | Fertilization                       | <i>Faidherbia albida</i> , <i>Vitellaria paradoxa</i>                                                                                       | 11.37 N  | 3.27 W    | -                    |
| Duke_temperateforest              | Fertilization                       | Temperate forest                                                                                                                            | 35.95 N  | 79.15 W   | >50                  |
| DukeFACE                          | CO <sub>2</sub> xFertilization      | <i>Pinus taeda</i> forest                                                                                                                   | 35.95 N  | 79.15 W   | 13                   |
| EUROFACE                          | CO <sub>2</sub> xFertilization      | <i>Populus alba</i> , <i>nigra</i> and <i>euramericana</i>                                                                                  | 42.37 N  | 11.8 W    | 3 year SRC           |
| Escambia County                   | Fertilization                       | <i>Pinus taeda</i>                                                                                                                          | 31.17 N  | 87.33 W   | seedlings            |
| Flakaliden                        | Fertilization                       | <i>Picea abies</i>                                                                                                                          | 64.12 N  | 19.45 E   | 40                   |
| Glendevon                         | CO <sub>2</sub> xFertilization      | <i>Betula pendula</i> , <i>Picea sitchensis</i> , <i>Alnus glutinosa</i> , <i>Pinus sylvestris</i>                                          | 56.2 N   | 4 W       | 1                    |
| Golfo Dulce Forest Reserve        | Fertilization                       | Tropical forest                                                                                                                             | 8.72 N   | 83.62 W   | -                    |
| Greene County                     | Fertilization                       | <i>Pinus taeda</i>                                                                                                                          | 32.42 N  | 88.45 W   | seedlings            |
| Harvard Forest_Fertilization      | Fertilization                       | Mixed hardwood stand                                                                                                                        | 42.5 N   | 72.33 W   | 55                   |
| Harvard Forest_Fertilization      | Fertilization                       | <i>Pinus resinosa</i>                                                                                                                       | 42.5 N   | 72.33 W   | 75                   |
| Heinola                           | FertilizationxWater                 | <i>Picea abies</i>                                                                                                                          | 61.22 N  | 26 E      | mature               |
| Hubbard Brook Experimental Forest | Fertilization                       | <i>Betula allegheniensis</i>                                                                                                                | 43.93 N  | 71.75 W   | 85                   |
| Maoxian                           | WarmingxFertilization               | <i>Picea asperata</i>                                                                                                                       | 32.68 N  | 103.88 E  | 3                    |
| Michigan_A                        | Fertilization                       | <i>Acer saccharum</i>                                                                                                                       | 46.87 N  | 88.88 W   | 94                   |

|                           |                     |                        |       |   |        |   |           |
|---------------------------|---------------------|------------------------|-------|---|--------|---|-----------|
| Michigan_B                | Fertilization       | Acer saccharum         | 45.55 | N | 84.85  | W | 88        |
| Michigan_C                | Fertilization       | Acer saccharum         | 44.38 | N | 85.83  | W | 89        |
| Michigan_D                | Fertilization       | Acer saccharum         | 43.67 | N | 86.15  | W | 93        |
| Norrleden                 | Fertilization       | Pinus sylvestris       | 64.35 | N | 19.75  | E | 43        |
| Sahalahti                 | FertilizationxWater | Picea abies            | 61.43 | N | 24.4   | E | mature    |
| Sambong Exhibition Forest | Fertilization       | Larix leptolepis       | 35.43 | N | 127.62 | E | 36        |
| Santa Rosa County         | Fertilization       | Populus deltoides      | 30.83 | N | 87.18  | W | 7         |
| Santa Rosa County         | Fertilization       | Pinus taeda            | 30.83 | N | 87.18  | W | 7         |
| Santa Rosa County         | FertilizationxWater | Populus deltoides      | 30.83 | N | 87.18  | W | 7         |
| Santa Rosa County         | FertilizationxWater | Platanus occidentalis  | 30.83 | N | 87.18  | W | 7         |
| Santa Rosa County         | FertilizationxWater | Pinus taeda            | 30.83 | N | 87.18  | W | 7         |
| Santa Rosa County         | FertilizationxWater | Quercus falcata        | 30.83 | N | 87.18  | W | 7         |
| SETRES                    | Fertilization       | Pinus taeda            | 34.84 | N | 79.48  | W | 8         |
| Turkey Hill Plantations   | Fertilization       | Acer saccharum         | 42.45 | N | 76.42  | W | 65        |
| Turkey Hill Plantations   | Fertilization       | Quercus rubra          | 42.45 | N | 76.42  | W | 65        |
| UMBS_populus(eur.)        | CO2xFertilization   | Populus x euramericana | 45.57 | N | 84.67  | W | cuttings  |
| UMBS_populus(trem.)       | CO2xFertilization   | Populus tremuloides    | 45.57 | N | 84.67  | W | seedlings |
| UMBS_populus(trem.II)     | CO2xFertilization   | Populus tremuloides    | 45.57 | N | 84.67  | W | seedlings |
| USDA Placerville          | CO2xFertilization   | Pinus ponderosa        | 38.73 | N | 120.8  | W | 3         |
| Virginia                  | Fertilization       | Pinus taeda            | 36.67 | N | 76.93  | W | 33        |

2: Data entries in the database and site were these data were obtained

| Site Name                                     | Litterfall | Microbial biomass | Total biomass | FRP | Litter decom-position | Rh | Root respiration | SCE | soil C |
|-----------------------------------------------|------------|-------------------|---------------|-----|-----------------------|----|------------------|-----|--------|
| Barro Colorado Nature Monument                |            |                   |               |     | *                     |    |                  |     |        |
| Bear Brooks Watershed (Betula)                |            |                   |               |     | *                     |    |                  |     |        |
| Bear Brooks Watershed (Betula)+               |            |                   |               |     | *                     |    |                  |     |        |
| Bear Brooks Watershed (Fagus)                 |            |                   |               |     | *                     |    |                  |     |        |
| Bear Brooks Watershed (Picea)                 |            |                   |               |     | *                     |    |                  |     |        |
| Birmensdorf (acidic, fert)                    |            |                   |               |     |                       |    |                  | *   | *      |
| Birmensdorf (acidic, fert x CO2)              |            |                   |               |     |                       |    |                  | *   | *      |
| Birmensdorf (calcareous, fert)                |            |                   |               |     |                       |    |                  | *   | *      |
| Birmensdorf (calcareous, fert x CO2)          |            |                   |               |     |                       |    |                  | *   | *      |
| Boulder                                       | *          |                   |               | *   |                       | *  |                  | *   |        |
| Central Alaska                                |            | *                 |               |     |                       |    |                  | *   |        |
| Cedar Creek (acer)                            |            | *                 |               |     | *                     |    |                  |     | *      |
| Cedar Creek (Pinus)                           |            | *                 |               |     | *                     |    |                  |     | *      |
| Cedar Creek (Populus1)                        |            | *                 |               |     | *                     |    |                  |     | *      |
| Cedar Creek (Populus2)                        |            | *                 |               |     | *                     |    |                  |     | *      |
| Cedar Creek (Quercus1)                        |            | *                 |               |     | *                     |    |                  |     | *      |
| Cedar Creek (Quercus2)                        |            | *                 |               |     | *                     |    |                  |     | *      |
| Dinghushan Biosphere Reserve (Pinus)          | *          |                   |               |     | *                     |    |                  | *   | *      |
| Dinghushan Biosphere Reserve (Pinus)+         | *          |                   |               |     | *                     |    |                  | *   | *      |
| Dinghushan Biosphere Reserve (Mixed)          | *          |                   |               |     | *                     |    | *                | *   |        |
| Dinghushan Biosphere Reserve (Mixed)+         | *          |                   |               |     | *                     |    | *                | *   |        |
| Dinghushan Biosphere Reserve (Cryptocarya)    |            |                   |               | *   |                       |    |                  |     |        |
| Dinghushan Biosphere Reserve (Cryptocarya)+   |            |                   |               | *   |                       |    |                  |     |        |
| Dinghushan Biosphere Reserve (Cryptocarya)++  |            |                   |               | *   |                       |    |                  |     |        |
| Dinghushan Biosphere Reserve (Cryptocarya)+++ |            |                   |               | *   |                       |    |                  |     |        |
| Dinghushan Biosphere Reserve (Schima)         |            |                   |               | *   |                       |    |                  |     |        |
| Dinghushan Biosphere Reserve (Schima)+        |            |                   |               | *   |                       |    |                  |     |        |
| Dinghushan Biosphere Reserve (Schima)++       |            |                   |               | *   |                       |    |                  |     |        |
| Dinghushan Biosphere Reserve (Schima)+++      |            |                   |               | *   |                       |    |                  |     |        |
| Dossi (Faidherbia)                            |            |                   |               |     |                       | *  |                  |     |        |
| Dossi (Vitellaria)                            |            |                   |               |     |                       | *  |                  |     |        |



|                                          |   |   |   |   |   |   |
|------------------------------------------|---|---|---|---|---|---|
| Duke_temperateforest                     |   |   |   |   |   | * |
| Duke_temperateforest+                    |   |   |   |   |   | * |
| DukeFACE (fert)                          |   |   |   | * | * |   |
| DukeFACE (fert x CO2)                    |   |   |   | * | * |   |
| Escambia County                          |   | * |   |   |   | * |
| EUROFACE (alba, fert)                    | * |   |   | * | * | * |
| EUROFACE (nigra, fert)                   | * |   |   | * | * | * |
| EUROFACE (euramericana, fert)            | * |   |   | * | * | * |
| EUROFACE (alba, fert x CO2)              | * |   |   | * | * | * |
| EUROFACE (nigra, fert x CO2)             | * |   |   | * | * | * |
| EUROFACE (euramericana, fert x CO2)      | * |   |   | * | * | * |
| EUROFACE (alba, CO2xFert pooled)         |   | * |   |   |   |   |
| EUROFACE (nigra, CO2xFert pooled)        |   | * |   |   |   |   |
| EUROFACE (euramericana, CO2xFert pooled) |   | * |   |   |   |   |
| EUROFACE (all species, fert)             |   | * |   |   |   |   |
| EUROFACE (all species, fert x CO2)       |   | * |   |   |   |   |
| Flakaliden                               |   | * |   | * | * | * |
| Glendevon (Betula, fert)                 |   |   |   |   |   |   |
| Glendevon (Betula, fert x CO2)           |   |   |   |   |   |   |
| Glendevon (Picea, fert)                  |   |   |   |   |   | * |
| Glendevon (Picea, fert x CO2)            |   |   |   |   |   | * |
| Glendevon (Alnus, fert)                  |   |   |   |   |   | * |
| Glendevon (Alnus, fert x CO2)            |   |   |   |   |   | * |
| Glendevon (Pinus, fert)                  |   |   |   |   |   | * |
| Glendevon (Pinus, fert x CO2)            |   |   |   |   |   | * |
| Golfo Dulce Forest Reserve               |   |   |   |   |   | * |
| Greene County                            |   | * |   |   |   | * |
| Harvard Forest_mixed                     | * |   | * | * | * | * |
| Harvard Forest_mixed+                    | * |   |   | * | * | * |
| Harvard Forest_pine                      | * |   | * | * | * | * |
| Harvard Forest_pine+                     | * |   |   | * | * | * |
| Heinola (fert)                           |   | * |   | * |   |   |
| Heinola (fert x H2O)                     |   | * |   | * |   |   |
| Hubbard Brook Experimental Forest        |   | * |   | * |   | * |
| Maoxian (fert)                           |   | * |   |   |   |   |

|                                            |           |           |           |          |           |           |           |           |           |
|--------------------------------------------|-----------|-----------|-----------|----------|-----------|-----------|-----------|-----------|-----------|
| Maoxian (fertxwarming)                     |           |           | *         |          |           |           |           |           |           |
| Michigan_A                                 |           |           |           |          |           |           | *         | *         | *         |
| Michigan_B                                 |           |           |           |          |           |           | *         | *         | *         |
| Michigan_C                                 |           |           |           |          |           |           | *         | *         | *         |
| Michigan_D                                 |           |           |           |          |           |           | *         | *         | *         |
| Norrleden                                  |           |           |           |          |           |           |           | *         | *         |
| Norrleden+                                 |           |           |           |          |           |           |           | *         | *         |
| Norrleden2N                                |           |           |           |          |           |           |           | *         | *         |
| Norrleden+N                                |           |           |           |          |           |           |           | *         | *         |
| Sahalahti (fert)                           |           | *         |           |          |           |           | *         | *         | *         |
| Sahalahti (fert x H2O)                     |           | *         |           |          |           |           | *         | *         | *         |
| Sambong Exhibition Forest                  | *         |           |           |          | *         |           |           |           |           |
| Santa Rosa County (Populus)                |           | *         |           | *        |           |           |           | *         | *         |
| Santa Rosa County (Populus)+               |           | *         |           | *        |           |           |           | *         | *         |
| Santa Rosa County (Populus)++              |           |           |           |          |           |           |           | *         | *         |
| Santa Rosa County (Pine)                   |           | *         |           | *        |           |           |           | *         | *         |
| Santa Rosa County (Pine)+                  |           | *         |           | *        |           |           |           | *         | *         |
| Santa Rosa County (Pine)++                 |           |           |           |          |           |           |           | *         | *         |
| Santa Rosa County (Populus, fert x H2O)    |           |           |           |          |           |           |           |           |           |
| Santa Rosa County (Populus, fert x H2O)+   |           |           |           |          |           |           |           |           |           |
| Santa Rosa County (Populus, fert x H2O)++  |           |           |           |          |           |           |           |           |           |
| Santa Rosa County (Platanus, fert x H2O)   |           |           |           |          |           |           |           |           |           |
| Santa Rosa County (Platanus, fert x H2O)+  |           |           |           |          |           |           |           |           |           |
| Santa Rosa County (Platanus, fert x H2O)++ |           |           |           |          |           |           |           |           |           |
| Santa Rosa County (Pinus, fert x H2O)      |           |           |           |          |           |           |           |           |           |
| Santa Rosa County (Pinus, fert x H2O)+     |           |           |           |          |           |           |           |           |           |
| Santa Rosa County (Pinus, fert x H2O)++    |           |           |           |          |           |           |           |           |           |
| Santa Rosa County (Quercus, fert x H2O)    |           |           |           |          |           |           |           |           |           |
| Santa Rosa County (Quercus, fert x H2O)+   |           |           |           |          |           |           |           |           |           |
| Santa Rosa County (Quercus, fert x H2O)++  |           |           |           |          |           |           |           |           |           |
| SETRES_F                                   |           |           |           |          |           |           | *         | *         | *         |
| SETRES_HF                                  |           |           |           |          |           |           | *         | *         | *         |
| Turkey Hill Plantations (Acer)             |           | *         |           |          |           |           | *         | *         | *         |
| Turkey Hill Plantations (Quercus)          |           | *         |           |          |           |           | *         | *         | *         |
| UMBS_populus(eur. fert)                    |           | *         | *         |          |           |           |           |           |           |
| UMBS_populus(eur. fert x CO2)              |           | *         | *         |          |           |           |           |           |           |
| UMBS_populus(trem. fert)                   |           |           | *         |          |           |           |           |           |           |
| UMBS_populus(trem. fert x CO2)             |           |           | *         |          |           |           |           |           |           |
| UMBS_populus(trem.II fert)                 |           |           |           |          |           |           | *         | *         | *         |
| UMBS_populus(trem.II fert x CO2)           |           |           |           |          |           |           | *         | *         | *         |
| USDA Placerville (medium fert)             |           |           | *         | *        |           |           | *         | *         | *         |
| USDA Placerville (high fert)               |           |           | *         | *        |           |           | *         | *         | *         |
| USDA Placerville (medium fert x CO2)       |           |           | *         | *        |           |           | *         | *         | *         |
| USDA Placerville (high fert x CO2)         |           |           | *         | *        |           |           | *         | *         | *         |
| Virginia                                   |           |           |           |          |           |           |           | *         | *         |
| <b>Total number of entries</b>             | <b>16</b> | <b>22</b> | <b>24</b> | <b>9</b> | <b>20</b> | <b>31</b> | <b>17</b> | <b>57</b> | <b>27</b> |

**3: Short description of the sampling method used per variable per site, the sampling year, and source reference.**

| Site Name                      | Data used             | Methods                                                                                                                                                                                                    | Sampling years  | Unit                                        | Source                   |
|--------------------------------|-----------------------|------------------------------------------------------------------------------------------------------------------------------------------------------------------------------------------------------------|-----------------|---------------------------------------------|--------------------------|
| Barro Colorado Nature Monument | litter decomposition  | litter bags                                                                                                                                                                                                | 2003            | k-value                                     | 14                       |
| Bear Brooks Watershed          | litter decomposition  | litter bags                                                                                                                                                                                                | 1988-1991       | % remaining                                 | 15                       |
| Birmensdorf                    | SCE                   | EGM-1 soil respiration system                                                                                                                                                                              | 1995, 1997-1998 | $\mu\text{mol}/\text{m}^2/\text{s}$         | 16                       |
|                                | soil C                | soil coring + elemental analyzer                                                                                                                                                                           | 1998            | %                                           | 17                       |
| Boulder                        | litterfall            | litter screens                                                                                                                                                                                             | 1991-1993       | $\text{g C}/\text{m}^2/\text{year}$         | 18                       |
|                                | Rh                    | trenching + soda lime method                                                                                                                                                                               | 1991-1993       | $\text{g C}/\text{m}^2/\text{year}$         | 18                       |
|                                | SCE                   | soda lime method                                                                                                                                                                                           | 1991-1993       | $\text{g C}/\text{m}^2/\text{year}$         | 18                       |
| Central Alaska                 | microbial biomass     | chloroform fumigation extraction                                                                                                                                                                           | 2006            | $\mu\text{g C}/\text{g}$                    | 19                       |
|                                | SCE                   | EGM-4 infrared gas analyzer                                                                                                                                                                                | 2005-2006       | $\text{mgC}/\text{m}^2/\text{h}$            | 19                       |
| Cedar Creek                    | microbial biomass     | chloroform fumigation extraction                                                                                                                                                                           | 1999-2004       | $\mu\text{g C}/\text{g soil}$               | 20                       |
|                                | litter decomposition  | litter bags                                                                                                                                                                                                | 1999-2004       | decay constant                              | 20                       |
|                                | soil C                | soil coring + elemental analyzer                                                                                                                                                                           | 1999-2004       | $\text{mg C}/\text{g soil}$                 | 20                       |
| Dinghushan Biosphere Reserve   | litterfall            | litter traps                                                                                                                                                                                               | 2005            | $\text{g}/\text{m}^2$                       | 21                       |
|                                | total biomass         | harvest                                                                                                                                                                                                    | 2003            | $\text{g}$                                  | 22                       |
|                                | litter decomposition  | litter bags                                                                                                                                                                                                | 2003-2005       | % remaining                                 | 23                       |
|                                | root respiration      | calculated as $\text{SCE} \times 0.45 \times \text{litter input}$ (assuming steady state status between soil Rh and litter input and that 45% of litter decomposition released as $\text{CO}_2\text{-C}$ ) | 2005            | $\text{g C}/\text{m}^2$                     | 21                       |
|                                | SCE                   | static chamber technique                                                                                                                                                                                   | 2005            | $\text{g CO}_2\text{-C}/\text{m}^2$         | 21                       |
|                                | soil C                | soil sampling + elemental analyzer                                                                                                                                                                         | 2005            | $\text{mg}/\text{kg}$                       | 24                       |
| Dossi                          | Rh                    | soil incubation                                                                                                                                                                                            | 2004            | $\mu\text{g CO}_2/\text{h}/\text{g}$        | 25                       |
| Duke_temperateforest           | SCE                   | inverse box technique                                                                                                                                                                                      | 1992            | $\text{gC}/\text{m}^2/\text{day}$           | 26                       |
| DukeFACE                       | Rh                    | soil incubation                                                                                                                                                                                            | 2005            | $\mu\text{g C}/\text{g soil}$               | 27                       |
|                                | fine root respiration | measured by enclosing intact, attached fine roots in buried gas exchange cuvettes                                                                                                                          | 2005            | $\mu\text{mol CO}_2/\text{m}^2/\text{year}$ | 28                       |
| EUROFACE                       | litterfall            | litter baskets                                                                                                                                                                                             | 2003            | $\text{g}/\text{m}^2/\text{year}$           | 29                       |
|                                | microbial biomass     | chloroform fumigation extraction                                                                                                                                                                           | 2004            | $\mu\text{g biomass N}/\text{g}$            | 30                       |
|                                | total biomass         | Harvest                                                                                                                                                                                                    | 2002            | $\text{g}/\text{m}^2$                       | 31                       |
|                                | Rh                    | soil incubation/or as fraction of SCE                                                                                                                                                                      | 2004/2003       | $\mu\text{mol CO}_2/\text{m}^2/\text{s}$    | De Angelis (unpublished) |
|                                | root respiration      | estimated as fraction of SCE                                                                                                                                                                               | 2003            | $\mu\text{mol CO}_2/\text{m}^2/\text{s}$    | De Angelis (unpublished) |

|                                   |                       |                                                                       |                  |                                          |                          |
|-----------------------------------|-----------------------|-----------------------------------------------------------------------|------------------|------------------------------------------|--------------------------|
|                                   | SCE                   | gas exchange measurements                                             | 2003-2004        | $\mu\text{mol CO}_2/\text{m}^2/\text{s}$ | De Angelis (unpublished) |
| Escambia County                   | soil C                | soil coring + elemental analyzer                                      | 2001             | Mg/ha                                    | 32                       |
| Flakaliden                        | total biomass         | harvest                                                               | 1998, 1999       | g/m <sup>2</sup>                         | 33                       |
|                                   | Rh                    | girdling + measured in a closed system using an infrared gas analyzer | 2002             | g CO <sub>2</sub> -C/m <sup>2</sup> /h   | 34                       |
|                                   | root respiration      | calculated by subtracting Rh from SCE                                 | 2002             | g CO <sub>2</sub> -C/m <sup>2</sup> /h   | 34                       |
|                                   | SCE                   | measured in a closed system using an infrared gas analyzer            | 2002             | g CO <sub>2</sub> -C/m <sup>2</sup> /h   | 34                       |
| Glendevon *                       | SCE                   | gas exchange measurements                                             | 1994, 1996, 1997 | $\mu\text{mol CO}_2/\text{m}^2/\text{s}$ | 35,36                    |
| Golfo Dulce Forest Reserve        | SCE                   | gas exchange measurements                                             | 2004-2005        | mg CO <sub>2</sub> -C/m <sup>2</sup> /h  | 37                       |
| Greene County                     | soil C                | soil coring + elemental analyzer                                      | 2001             | Mg/ha                                    | 32                       |
| Harvard Forest_Fertilization      | litterfall            | litter baskets                                                        | 1989-2002        | g/m <sup>2</sup>                         | 38                       |
|                                   | litter decomposition  | litter bags                                                           | 1989-1992        | % remaining                              | 39                       |
|                                   | Rh                    | soil incubation                                                       | 2001             | mg C/kg/h                                | 40                       |
|                                   | SCE                   | portable infrared gas analyzer                                        | 2001             | g C/m <sup>2</sup>                       | 40                       |
| Heinola                           | microbial biomass     | soil sampling + chloroform fumigation extraction                      | 1999             | g C/kg OM                                | 41                       |
|                                   | SCE                   | soil sampling + lab incubation                                        | 1999             | mg N/kg OM                               | 41                       |
| Hubbard Brook Experimental Forest | microbial biomass     | soil sampling + modification of chloroform fumigation extraction      | 2003             | $\mu\text{g C/g OM}$                     | 42                       |
|                                   | Rh                    | soil sampling + lab incubation                                        | 2003             | $\mu\text{g C/g OM}$                     | 42                       |
|                                   | SCE                   | gas exchange measurements                                             | 2002-2004        | $\mu\text{mol CO}_2/\text{m}^2/\text{s}$ | 42                       |
| Maoxian                           | total biomass         | harvest                                                               | 2007             | g DW                                     | 43                       |
| Michigan_A, B, C, D               | fine root respiration | Root harvest + gas exchange in cuvettes                               | 2001             | nmol CO <sub>2</sub> /g/s                | 44                       |
|                                   | SCE                   | measured using a dynamic chamber                                      | 1999, 2001       | $\mu\text{mol CO}_2/\text{m}^2/\text{s}$ | 44                       |
|                                   | soil C                | soil coring + elemental analyzer                                      | 2004             | g C/m <sup>2</sup>                       | 45                       |
| Norrheden                         | litter decomposition  | model estimated based on data retained from experimental site         | 2021             | % C remaining                            | 46                       |
|                                   | SCE                   | gas exchange measurements                                             | 1996, 1997, 1999 | mg C/m <sup>2</sup> /h                   | 46                       |
|                                   | soil C                | soil cores analyzed for C with accelerator mass spectrometry (AMS)    | 1992             | Mg C/ha                                  | 46                       |
| Sahalahti                         | microbial biomass     | soil sampling + chloroform fumigation extraction                      | 1999             | g C/kg OM                                | 41                       |
|                                   | SCE                   | soil sampling + lab incubation                                        | 1999             | mg N/kg OM                               | 41                       |
| Sambong Exhibition Forest         | litterfall            | litter traps                                                          | 2003-2004        | g C/m <sup>2</sup> /year                 | 47                       |

|                         |                      |                                                                                             |                  |                                         |    |
|-------------------------|----------------------|---------------------------------------------------------------------------------------------|------------------|-----------------------------------------|----|
|                         | litter decomposition | litter bags                                                                                 | 2003             | g/kg/year                               | 47 |
|                         | SCE                  | measured in situ using an infrared gas analyzer equipped with a flow-through closed chamber | 2002-2004        | g CO <sub>2</sub> /m <sup>2</sup> /h    | 47 |
| Santa Rosa County       | microbial biomass    | chloroform fumigation extraction                                                            | 2001             | mg C/kg                                 | 48 |
|                         | SCE                  | soda lime method                                                                            | 2002             | g C/m <sup>2</sup> /year                | 48 |
| SETRES_F                | root respiration     | measured with root system in modified PVC chamber                                           | 1995             | μmol CO <sub>2</sub> /m <sup>2</sup> /s | 49 |
|                         | SCE                  | gas exchange measurements                                                                   | 1995             | μmol CO <sub>2</sub> /m <sup>2</sup> /s | 49 |
|                         | soil C               | soil coring + elemental analyzer                                                            | 1995             | mg/g                                    | 49 |
| SETRES_HF               | root respiration     | measured with root system in modified PVC chamber                                           | 1995             | μmol CO <sub>2</sub> /m <sup>2</sup> /s | 49 |
|                         | SCE                  | gas exchange measurements                                                                   | 1995             | μmol CO <sub>2</sub> /m <sup>2</sup> /s | 49 |
| Turkey Hill Plantations | microbial biomass    | soil sampling + modification of chloroform fumigation extraction                            | 2003             | μg C/g OM                               | 42 |
|                         | Rh                   | soil sampling + lab incubation                                                              | 2003             | μg C/g OM                               | 42 |
|                         | SCE                  | gas exchange measurements                                                                   | 2002-2004        | μmolCO <sub>2</sub> /m <sup>2</sup> /s  | 42 |
| UMBS_populus(eur.)      | microbial biomass    | chloroform fumigation extraction                                                            | 1993             | mg C/g soil                             | 50 |
|                         | total biomass        | harvest                                                                                     | 1992             | g/m <sup>2</sup>                        | 51 |
| UMBS_populus(trem.)     | total biomass        | harvest                                                                                     | 1995             | g/m <sup>2</sup>                        | 52 |
|                         | Rh                   | litter incubation                                                                           | 1998             | mg C                                    | 53 |
|                         | SCE                  | infrared gas analyzer                                                                       | 1995             | μmol/m <sup>2</sup> /s                  | 52 |
| USDA Placerville        | Rh                   | soil incubation                                                                             | 1993             | μg CO <sub>2</sub> -C/g soil/day        | 54 |
|                         | SCE                  | monitored from gas wells at 15 and 30 cm depth, SCE was calculated using the profile method | 1991, 1993, 1996 | kg C/m <sup>2</sup>                     | 55 |
|                         | soil C               | soil sampling + elemental analyzer                                                          | 1996             | mg/g                                    | 55 |
| Virginia                | SCE                  | infrared gas analyzer, with a dynamic closed cuvette                                        | 2004             | μmol CO <sub>2</sub> /m <sup>2</sup> /s | 56 |

4: Types and amount of N added to the plots in the different experiments.

| Site Name                                     | Treatments                               | Type                                                                                  | N quantity (g/m <sup>2</sup> /year)                                  |
|-----------------------------------------------|------------------------------------------|---------------------------------------------------------------------------------------|----------------------------------------------------------------------|
| Bear Brooks Watershed (Betula)                | Fertilization                            | NO <sub>3</sub>                                                                       | 2.8                                                                  |
| Bear Brooks Watershed (Betula)+               | Fertilization                            | NO <sub>3</sub>                                                                       | 5.6                                                                  |
| Bear Brooks Watershed (Fagus)                 | Fertilization                            | NO <sub>3</sub>                                                                       | 2.8                                                                  |
| Bear Brooks Watershed (Picea)                 | Fertilization                            | NO <sub>3</sub>                                                                       | 2.8                                                                  |
| Barro Colorado Nature Monument                | Fertilization                            | coated urea ((NH <sub>2</sub> ) <sub>2</sub> CO))                                     | 12.5                                                                 |
| Birmensdorf (acidic, fert)                    | CO <sub>2</sub> xFertilizationxSoil      | NH <sub>4</sub> NO <sub>3</sub>                                                       | 5 (1995-1996), 7 (1997-1998)                                         |
| Birmensdorf (calcareous, fert)                | CO <sub>2</sub> xFertilizationxSoil      | NH <sub>4</sub> NO <sub>3</sub>                                                       | 5 (1995-1996), 7 (1997-1998)                                         |
| <i>Birmensdorf (acidic, not fert)</i>         | <i>CO<sub>2</sub>xFertilizationxSoil</i> | <i>NH<sub>4</sub>NO<sub>3</sub></i>                                                   | <i>0.5 (1995-1996), 0.7 (1997-1998)</i>                              |
| <i>Birmensdorf (calcareous, not fert)</i>     | <i>CO<sub>2</sub>xFertilizationxSoil</i> | <i>NH<sub>4</sub>NO<sub>3</sub></i>                                                   | <i>0.5 (1995-1996), 0.7 (1997-1998)</i>                              |
| Boulder                                       | Fertilization                            | NH <sub>4</sub> NO <sub>3</sub>                                                       | 15                                                                   |
| Central Alaska                                | Fertilization                            | NH <sub>4</sub> NO <sub>3</sub>                                                       | 20 in 2002-2003, 10 thereafter (N)                                   |
| Cedar Creek                                   | Fertilization                            | NH <sub>4</sub> NO <sub>3</sub>                                                       | 10                                                                   |
| Dinghushan Biosphere Reserve (Pinus)          | Fertilization                            | NH <sub>4</sub> NO <sub>3</sub>                                                       | 5                                                                    |
| Dinghushan Biosphere Reserve (Pinus)+         | Fertilization                            | NH <sub>4</sub> NO <sub>3</sub>                                                       | 10                                                                   |
| Dinghushan Biosphere Reserve (Mixed)          | Fertilization                            | NH <sub>4</sub> NO <sub>3</sub>                                                       | 5                                                                    |
| Dinghushan Biosphere Reserve (Mixed)+         | Fertilization                            | NH <sub>4</sub> NO <sub>3</sub>                                                       | 10                                                                   |
| Dinghushan Biosphere Reserve (Cryptocarya)    | Fertilization                            | NH <sub>4</sub> NO <sub>3</sub>                                                       | 5                                                                    |
| Dinghushan Biosphere Reserve (Cryptocarya)+   | Fertilization                            | NH <sub>4</sub> NO <sub>3</sub>                                                       | 10                                                                   |
| Dinghushan Biosphere Reserve (Cryptocarya)+   | Fertilization                            | NH <sub>4</sub> NO <sub>3</sub>                                                       | 15                                                                   |
| Dinghushan Biosphere Reserve (Cryptocarya)++  | Fertilization                            | NH <sub>4</sub> NO <sub>3</sub>                                                       | 30                                                                   |
| Dinghushan Biosphere Reserve (Cryptocarya)+++ | Fertilization                            | NH <sub>4</sub> NO <sub>3</sub>                                                       | 30                                                                   |
| Dinghushan Biosphere Reserve (Schima)         | Fertilization                            | NH <sub>4</sub> NO <sub>3</sub>                                                       | 5                                                                    |
| Dinghushan Biosphere Reserve (Schima)+        | Fertilization                            | NH <sub>4</sub> NO <sub>3</sub>                                                       | 10                                                                   |
| Dinghushan Biosphere Reserve (Schima)++       | Fertilization                            | NH <sub>4</sub> NO <sub>3</sub>                                                       | 15                                                                   |
| Dinghushan Biosphere Reserve (Schima)+++      | Fertilization                            | NH <sub>4</sub> NO <sub>3</sub>                                                       | 30                                                                   |
| Dossi (Faidherbia anf Vitellaria)             | Fertilization                            | urea 46%N, TSP 21% P, KCl                                                             | 8, 5 and 4 respectively                                              |
| Duke_temperateforest                          | Fertilization                            | NH <sub>4</sub> NO <sub>3</sub>                                                       | 350 mg N                                                             |
| Duke_temperateforest+                         | Fertilization                            | NH <sub>4</sub> NO <sub>3</sub> , Na <sub>2</sub> HPO <sub>4</sub> .7H <sub>2</sub> O | 350 mg N + 70 mg P                                                   |
| DukeFACE (fert)                               | CO <sub>2</sub> xFertilization           | NH <sub>4</sub> NO <sub>3</sub>                                                       | 11.2                                                                 |
| <i>DukeFACE (not fert)</i>                    | <i>CO<sub>2</sub>xFertilization</i>      | <i>NH<sub>4</sub>NO<sub>3</sub></i>                                                   | <i>0</i>                                                             |
| Escambia County                               | Fertilization                            | DAP (diammonium phosphate)                                                            | 4.5                                                                  |
| EUROFACE (all species, fert)                  | CO <sub>2</sub> xFertilization           | balanced fertilizer                                                                   | 21.2 N (in 2002), 29 N (in 2003-2004) (for other elements see paper) |
| <i>EUROFACE (all species, not fert)</i>       | <i>CO<sub>2</sub>xFertilization</i>      | <i>balanced fertilizer</i>                                                            | <i>0</i>                                                             |

|                                                         |                                     |                                                                                         |                                              |
|---------------------------------------------------------|-------------------------------------|-----------------------------------------------------------------------------------------|----------------------------------------------|
| Flakaliden                                              | Fertilization                       | fertilizer mix (see paper)                                                              | based on foliar nutrient analysis every year |
| Glendevon (all species, fert)                           | CO <sub>2</sub> xFertilization      | N (plus a balanced supply of other nutrients)                                           | 7                                            |
| <i>Glendevon (all species, not fert)</i>                | <i>CO<sub>2</sub>xFertilization</i> | <i>N (plus a balanced supply of other nutrients)</i>                                    | <i>0</i>                                     |
| Golfo Dulce Forest Reserve                              | Fertilization                       | NH <sub>4</sub> NO <sub>3</sub>                                                         | 15                                           |
| Greene County                                           | Fertilization                       | DAP (diammonium phosphate)                                                              | 4.5                                          |
| Harvard Forest_mixed                                    | Fertilization                       | NH <sub>4</sub> NO <sub>3</sub>                                                         | 5 (first year only 3.7)                      |
| Harvard Forest_mixed+                                   | Fertilization                       | NH <sub>4</sub> NO <sub>3</sub>                                                         | 15 (first year only 12)                      |
| Harvard Forest_pine                                     | Fertilization                       | NH <sub>4</sub> NO <sub>3</sub>                                                         | 5 (first year only 3.7)                      |
| Harvard Forest_pine+                                    | Fertilization                       | NH <sub>4</sub> NO <sub>3</sub>                                                         | 15 (first year only 12)                      |
| Heinola                                                 | FertilizationxWater                 | (NH <sub>4</sub> ) <sub>2</sub> SO <sub>4</sub> , urea, NH <sub>4</sub> NO <sub>3</sub> | 63.3 (total over 35 years)                   |
| Hubbard Brook Experimental Forest                       | Fertilization                       | macro-/micronutrient mix                                                                | see paper (16.7 N)                           |
| Iatinga Experimental Station                            | Fertilization                       | (NH <sub>4</sub> ) <sub>2</sub> SO <sub>4</sub>                                         | 12                                           |
| Michigan_A                                              | Fertilization                       | NaNO <sub>3</sub>                                                                       | 3                                            |
| Michigan_B                                              | Fertilization                       | NaNO <sub>3</sub>                                                                       | 3                                            |
| Michigan_C                                              | Fertilization                       | NaNO <sub>3</sub>                                                                       | 3                                            |
| Michigan_D                                              | Fertilization                       | NaNO <sub>3</sub>                                                                       | 3                                            |
| Norrleden                                               | Fertilization                       | urea and NH <sub>4</sub> NO <sub>3</sub>                                                | 6                                            |
| Norrleden+                                              | Fertilization                       | urea and NH <sub>4</sub> NO <sub>3</sub> , triple superphosphate, KCl                   | 6, 4, 7.6 respectively                       |
| Norrleden2N                                             | Fertilization                       | urea and NH <sub>4</sub> NO <sub>3</sub>                                                | 12                                           |
| Norrleden+N                                             | Fertilization                       | urea and NH <sub>4</sub> NO <sub>3</sub> , triple superphosphate, KCl                   | 12, 4, 7.6 respectively                      |
| Sahalahti                                               | FertilizationxWater                 | (NH <sub>4</sub> ) <sub>2</sub> SO <sub>4</sub> , urea, NH <sub>4</sub> NO <sub>3</sub> | 101.4 (total over 35 years)                  |
| Sambong Exhibition Forest                               | Fertilization                       | urea, superphosphate and KCl                                                            | 11.2, 7.5, 3.7 respectively                  |
| Santa Rosa County (Populus)                             | Fertilization                       | N                                                                                       | 5.6                                          |
| Santa Rosa County (Populus)+                            | Fertilization                       | N                                                                                       | 11.2                                         |
| Santa Rosa County (Populus)++                           | Fertilization                       | N                                                                                       | 22.4                                         |
| Santa Rosa County (Pine)                                | Fertilization                       | N                                                                                       | 5.6                                          |
| Santa Rosa County (Pine)+                               | Fertilization                       | N                                                                                       | 11.2                                         |
| Santa Rosa County (Pine)++                              | Fertilization                       | N                                                                                       | 22.4                                         |
| Santa Rosa County (Populus, fert x H <sub>2</sub> O)    | FertilizationxWater                 | 47% urea, 29% NH <sub>4</sub> , 24% NO <sub>3</sub>                                     | 5.6                                          |
| Santa Rosa County (Populus, fert x H <sub>2</sub> O)+   | FertilizationxWater                 | 47% urea, 29% NH <sub>4</sub> , 24% NO <sub>3</sub>                                     | 11.2                                         |
| Santa Rosa County (Populus, fert x H <sub>2</sub> O)++  | FertilizationxWater                 | 47% urea, 29% NH <sub>4</sub> , 24% NO <sub>3</sub>                                     | 22.4                                         |
| Santa Rosa County (Platanus, fert x H <sub>2</sub> O)   | FertilizationxWater                 | 47% urea, 29% NH <sub>4</sub> , 24% NO <sub>3</sub>                                     | 5.6                                          |
| Santa Rosa County (Platanus, fert x H <sub>2</sub> O)+  | FertilizationxWater                 | 47% urea, 29% NH <sub>4</sub> , 24% NO <sub>3</sub>                                     | 11.2                                         |
| Santa Rosa County (Platanus, fert x H <sub>2</sub> O)++ | FertilizationxWater                 | 47% urea, 29% NH <sub>4</sub> , 24% NO <sub>3</sub>                                     | 22.4                                         |
| Santa Rosa County (Pinus, fert x H <sub>2</sub> O)      | FertilizationxWater                 | 47% urea, 29% NH <sub>4</sub> , 24% NO <sub>3</sub>                                     | 5.6                                          |
| Santa Rosa County (Pinus, fert x H <sub>2</sub> O)+     | FertilizationxWater                 | 47% urea, 29% NH <sub>4</sub> , 24% NO <sub>3</sub>                                     | 11.2                                         |

|                                           |                     |                            |                                                                                                                           |
|-------------------------------------------|---------------------|----------------------------|---------------------------------------------------------------------------------------------------------------------------|
| Santa Rosa County (Pinus, fert x H2O)++   | FertilizationxWater | 47% urea, 29% NH4, 24% NO3 | 22.4                                                                                                                      |
| Santa Rosa County (Quercus, fert x H2O)   | FertilizationxWater | 47% urea, 29% NH4, 24% NO3 | 5.6                                                                                                                       |
| Santa Rosa County (Quercus, fert x H2O)+  | FertilizationxWater | 47% urea, 29% NH4, 24% NO3 | 11.2                                                                                                                      |
| Santa Rosa County (Quercus, fert x H2O)++ | FertilizationxWater | 47% urea, 29% NH4, 24% NO3 | 22.4                                                                                                                      |
| Savannah River                            | FertilizationxWater | balanced liquid fertilizer | between 4 and 120 depending on species                                                                                    |
| SETRES_F                                  | FertilizationxWater | urea                       | objective to maintain foliar N of 1.3%                                                                                    |
| SETRES_HF                                 | FertilizationxWater | urea                       | objective to maintain foliar N of 1.3%                                                                                    |
| Turkey Hill Plantations (Acer)            | Fertilization       | macro-/micronutrient mix   | see paper (16.7 N)                                                                                                        |
| Turkey Hill Plantations (Quercus)         | Fertilization       | macro-/micronutrient mix   | see paper (16.7 N)                                                                                                        |
| UMBS_populus(eur. fert)                   | CO2xFertilization   | high N soil                | 15.1 g/kg soil available N                                                                                                |
| UMBS_populus(eur. fert x CO2)             | CO2xFertilization   | low N soil                 | 4.55 g/kg soil available N                                                                                                |
| UMBS_populus(trem.II fert)                | CO2xFertilization   | high N soil                | mineralization: 89 ng/g/day (low) and 333 (high); soil N: 210 µg/g soil (low), 970 (high); C:N 14.8 (low) and 13.3 (high) |
| UMBS_populus(trem.II fert x CO2)          | CO2xFertilization   | low N soil                 | mineralization: 89 ng/g/day (low) and 333 (high); soil N: 210 µg/g soil (low), 970 (high); C:N 14.8 (low) and 13.3 (high) |
| UMBS_acer(fert)                           | CO2xFertilization   | high N soil                | mineralization: 89 ng/g/day (low) and 333 (high); soil N: 210 µg/g soil (low), 970 (high); C:N 14.8 (low) and 13.3 (high) |
| UMBS_acer(fert x CO2)                     | CO2xFertilization   | low N soil                 | mineralization: 89 ng/g/day (low) and 333 (high); soil N: 210 µg/g soil (low), 970 (high); C:N 14.8 (low) and 13.3 (high) |
| UMBS_populus(trem.III fert)               | CO2xFertilization   | high N soil                | mineralization: 89 ng/g/day (low) and 333 (high); soil N: 210 µg/g soil (low), 970 (high); C:N 14.8 (low) and 13.3 (high) |
| UMBS_populus(trem.III fert x CO2)         | CO2xFertilization   | low N soil                 | mineralization: 89 ng/g/day (low) and 333 (high); soil N: 210 µg/g soil (low), 970 (high); C:N 14.8 (low) and 13.3 (high) |
| USDA Placerville (medium fert)            | CO2xFertilization   | (NH4)2SO4                  | 20                                                                                                                        |
| USDA Placerville (high fert)              | CO2xFertilization   | (NH4)2SO4                  | 10                                                                                                                        |
| USDA Placerville (not fert)               | CO2xFertilization   | (NH4)2SO4                  | 0                                                                                                                         |
| Vielsalm (fert)                           | CO2xFertilization   | liquid fertilizer          | 5L per growing season                                                                                                     |
| Vielsalm (not fert)                       | CO2xFertilization   | liquid fertilizer          | 0                                                                                                                         |
| Virginia                                  | Fertilization       | urea and superphosphate    | 11.2 and 8.4 respectively                                                                                                 |



### 3.2. Appendix 2: Site information and data used in the comparison of forests exposed to low versus high N deposition

Background information and data for the sites used in the comparison of heterotrophic respiration and soil CO<sub>2</sub> efflux between forests exposed to low and high N deposition (threshold: wet deposition = 5.5 kg N ha<sup>-1</sup> a<sup>-1</sup>; Figures 3 and 4). Data provided by Law should not be used without permission (bev.law@oregonstate.edu).

| Plot name         | Climatic region | Species                     | NPP<br>g C m <sup>-2</sup> a <sup>-1</sup> | SCE<br>g C m <sup>-2</sup> a <sup>-1</sup> | Rh<br>g C m <sup>-2</sup> a <sup>-1</sup> | Latitude | Longitude | Wet deposition | Source           |
|-------------------|-----------------|-----------------------------|--------------------------------------------|--------------------------------------------|-------------------------------------------|----------|-----------|----------------|------------------|
| CA Thompson 1     | Boreal          | <i>Picea mariana</i> Mill.  | 261                                        | 551                                        | 385                                       | 55.88 N  | 98.33 W   | 2.7            | <sup>57</sup>    |
| DE Bornhoved      | Temperate       | <i>Fagus sylvatica</i> L.   | 656                                        | 539                                        |                                           | 54.10 N  | 10.23 E   | 9.9            | <sup>58</sup>    |
| DE Hesse          | Temperate       | <i>Fagus sylvatica</i> L.   | 939                                        | 646                                        | 370                                       | 48.67 N  | 7.07 E    | 12.4           | <sup>59</sup>    |
| DE Lei 1          | Temperate       | <i>Fagus sylvatica</i> L.   | 649                                        |                                            | 321                                       | 51.33 N  | 10.36 E   | 9.8            | <sup>59</sup>    |
| DE Lei 2          | Temperate       | <i>Fagus sylvatica</i> L.   | 886                                        |                                            | 268                                       | 51.33 N  | 10.36 E   | 9.8            | <sup>59</sup>    |
| DE Lei 3          | Temperate       | <i>Fagus sylvatica</i> L.   | 599                                        |                                            | 302                                       | 51.33 N  | 10.36 E   | 9.8            | <sup>59</sup>    |
| DE Lei 4          | Temperate       | <i>Fagus sylvatica</i> L.   | 909                                        |                                            | 328                                       | 51.33 N  | 10.36 E   | 9.8            | <sup>59</sup>    |
| DE Tharandt 1     | Temperate       | <i>Picea abies</i> L.       | 655                                        |                                            | 323                                       | 50.91 N  | 13.46 E   | 11.3           | <sup>59</sup>    |
| DE Tharandt 2     | Temperate       | <i>Picea abies</i> L.       | 1199                                       |                                            | 344                                       | 50.93 N  | 13.48 E   | 11.3           | <sup>59</sup>    |
| DE Tharandt 3     | Temperate       | <i>Picea abies</i> L.       | 761                                        |                                            | 336                                       | 50.93 N  | 13.46 E   | 11.3           | <sup>59</sup>    |
| DE Waldstein      | Temperate       | <i>Picea abies</i> L.       | 665                                        | 711                                        | 262                                       | 50.20 N  | 11.88 E   | 12.7           | <sup>59</sup>    |
| DE Wetstein       | Temperate       | <i>Picea abies</i> L.       | 777                                        |                                            | 275                                       | 50.45 N  | 11.46 E   | 11.7           | <sup>59</sup>    |
| DK Soroe          | Temperate       | <i>Fagus sylvatica</i> L.   | 1035                                       |                                            | 369                                       | 55.49 N  | 11.65 E   | 9.0            | <sup>59</sup>    |
| IT Collelongo     | Temperate       | <i>Fagus sylvatica</i> L.   | 639                                        | 879                                        | 257                                       | 41.85 N  | 13.59 E   | 10.0           | <sup>59</sup>    |
| IT Monte di Mezzo | Temperate       | <i>Picea abies</i> L.       | 801                                        | 803                                        | 406                                       | 41.75 N  | 14.88 E   | 8.2            | <sup>60</sup>    |
| JP Takayama       | Temperate       | <i>Quercus crispula</i> Bl. | 744                                        | 886                                        |                                           | 36.10 N  | 137.41 E  | 5.4            | <sup>61,62</sup> |
| NL Loobos         | Temperate       | <i>Pinus sylvestris</i> L.  | 420                                        |                                            | 359                                       | 52.17 N  | 5.74 E    | 13.3           | <sup>59</sup>    |
| RU Zotino         | Boreal          | <i>Pinus sylvestris</i> L.  | 214                                        | 258                                        |                                           | 60.72 N  | 89.13 E   | 2.7            | <sup>63</sup>    |
| SE Flakaliden 1   | Boreal          | <i>Picea abies</i> L.       | 389                                        |                                            | 260                                       | 64.12 N  | 19.45 E   | 3.1            | <sup>59</sup>    |

|                   |           |                                     |      |      |     |         |          |     |                   |
|-------------------|-----------|-------------------------------------|------|------|-----|---------|----------|-----|-------------------|
| SE Flakaliden 2   | Boreal    | <i>Picea abies</i> L.               | 156  | 1214 | 476 | 64.12 N | 19.45 E  | 3.1 | <sup>64,65</sup>  |
| US Andrews 1      | Temperate | <i>Pseudotsuga menziesii</i> Franco | 1102 | 1752 | 461 | 44.26 N | 122.20 W | 1.3 | Law (unpublished) |
| US Andrews 2      | Temperate | <i>Pseudotsuga menziesii</i> Franco | 1095 | 2054 | 653 | 44.25 N | 122.20 W | 1.3 | Law (unpublished) |
| US Andrews 4      | Temperate | <i>Pseudotsuga menziesii</i> Franco | 1160 | 1590 | 675 | 44.25 N | 122.20 W | 1.3 | Law (unpublished) |
| US Andrews 5      | Temperate | <i>Pseudotsuga menziesii</i> Franco | 969  | 1483 | 670 | 44.23 N | 122.18 W | 1.3 | Law (unpublished) |
| US Andrews 6      | Temperate | <i>Pseudotsuga menziesii</i> Franco | 1044 | 1362 | 595 | 44.25 N | 122.18 W | 1.3 | Law (unpublished) |
| US Andrews 7      | Temperate | <i>Pseudotsuga menziesii</i> Franco | 836  | 1834 | 352 | 44.27N  | 122.22 W | 1.3 | Law (unpublished) |
| US Andrews 8      | Temperate | <i>Pseudotsuga menziesii</i> Franco | 926  | 2288 | 524 | 44.27 N | 122.23 W | 1.3 | Law (unpublished) |
| US Andrews 9      | Temperate | <i>Pseudotsuga menziesii</i> Franco | 804  | 2079 | 398 | 44.26 N | 122.19 W | 1.3 | Law (unpublished) |
| US Cascade Head 4 | Temperate | <i>Tsuga heterophylla</i> Sarg.     | 682  | 1265 | 411 | 45.11 N | 123.88 W | 3.7 | Law (unpublished) |
| US Cascade Head 5 | Temperate | <i>Tsuga heterophylla</i> Sarg.     | 511  | 1240 | 367 | 45.11 N | 123.88 W | 3.7 | Law (unpublished) |
| US Cascade Head 6 | Temperate | <i>Tsuga heterophylla</i> Sarg.     | 824  | 754  | 469 | 45.09 N | 123.88 W | 3.7 | Law (unpublished) |
| US Cascade Head 7 | Temperate | <i>Tsuga heterophylla</i> Sarg.     | 649  | 896  | 328 | 45.09 N | 123.88 W | 3.7 | Law (unpublished) |
| US Cascade Head 8 | Temperate | <i>Tsuga heterophylla</i> Sarg.     | 893  | 1131 | 448 | 45.09 N | 123.88 W | 3.7 | Law (unpublished) |
| US Cascade Head 9 | Temperate | <i>Tsuga heterophylla</i> Sarg.     | 657  | 1216 | 534 | 45.07 N | 123.89 W | 3.7 | Law (unpublished) |
| US Metolius       | Temperate | <i>Pinus ponderosa</i> Laws.        | 405  | 677  | 292 | 44.42 N | 121.67 W | 1.0 | Law (unpublished) |
| US Metolius 1     | Temperate | <i>Pinus ponderosa</i> Laws.        | 258  | 501  | 392 | 44.44 N | 121.57 W | 1.0 | Law (unpublished) |
| US Metolius 3     | Temperate | <i>Pinus ponderosa</i> Laws.        | 149  | 480  | 206 | 44.43 N | 121.61 W | 1.0 | Law (unpublished) |
| US Metolius 4     | Temperate | <i>Pinus ponderosa</i> Laws.        | 356  | 498  | 192 | 44.43 N | 121.59 W | 1.0 | Law (unpublished) |
| US Metolius 5     | Temperate | <i>Pinus ponderosa</i> Laws.        | 372  | 533  | 316 | 44.44 N | 121.59 W | 1.0 | Law (unpublished) |
| US Metolius 6     | Temperate | <i>Pinus ponderosa</i> Laws.        | 448  | 749  | 337 | 44.45 N | 121.56 W | 1.0 | Law (unpublished) |
| US Metolius 7     | Temperate | <i>Pinus ponderosa</i> Laws.        | 543  | 1039 | 357 | 44.43 N | 121.67 W | 1.0 | Law (unpublished) |
| US Metolius 8     | Temperate | <i>Pinus ponderosa</i> Laws.        | 246  | 558  | 290 | 44.45 N | 121.67 W | 1.0 | Law (unpublished) |
| US Metolius 9     | Temperate | <i>Pinus ponderosa</i> Laws.        | 639  | 1019 | 300 | 44.46 N | 121.66 W | 1.0 | Law (unpublished) |
| US Metolius young | Temperate | <i>Pinus ponderosa</i> Laws.        | 337  | 541  | 280 | 44.43 N | 121.57 W | 1.0 | Law (unpublished) |
| US Morgan Monroe  | Temperate | <i>Acer saccharum</i> Marsh.        | 976  | 852  | 650 | 39.32 N | 86.42 W  | 5.7 | <sup>66</sup>     |
| US UMBS 1         | Temperate | <i>Populus grandidentata</i> Michx. | 442  | 782  | 409 | 45.59 N | 84.71 W  | 5.4 | <sup>67</sup>     |
| US UMBS 2         | Temperate | <i>Populus grandidentata</i> Michx. | 488  | 782  | 432 | 45.59 N | 84.71 W  | 5.4 | <sup>67</sup>     |
| US UMBS 3         | Temperate | <i>Populus grandidentata</i> Michx. | 524  | 1090 | 441 | 45.59 N | 84.71 W  | 5.4 | <sup>67</sup>     |
| US UMBS 4         | Temperate | <i>Populus grandidentata</i> Michx. | 480  | 930  | 440 | 45.59 N | 84.71 W  | 5.4 | <sup>67</sup>     |

#### 4. Figures

**Figure S1:** Effect of experimental N-fertilization on decomposition of different litter types, as calculated by meta-analysis. Positive values indicate that N addition increased the factor, negative values indicate a decrease. Error bars indicate the 95% confidence interval. Data listed are the weighted means for n data points, which is listed along the y-axis. Listed are all datapoints, easily decomposable litter from *Betula*, *Acer* and *Populus*, litter that is difficult to decompose from *Quercus*, *Pinus*, *Larix*, *Picea* and *Fagus*, forest litter that was not separated between species (Mixed), and tropical litter.

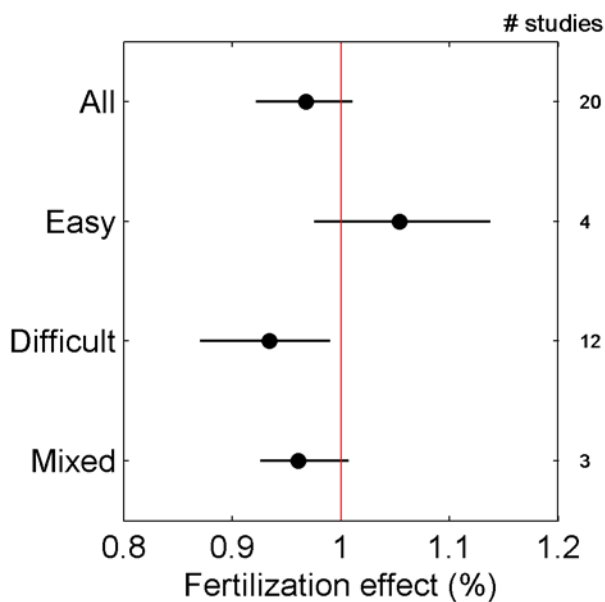

**Figure S2:** Effect of experimental N-addition on various C pools and fluxes as calculated by meta-analysis. The black circles are exactly the same as in Figure 1 (*i.e. all data included*); the grey circles and error bars are results obtained by excluding all forests younger than 5 years and/or enriched with CO<sub>2</sub> from the meta-analysis. Positive values indicate that N addition increased the factor, negative values indicate a decrease. Error bars indicate the 95% confidence interval. Data are the weighted means for n data points (n is listed along the righthand axis). Parameters listed are C inputs: litterfall (LF) and fine root production (FRP), C pools: total tree biomass (TB), microbial biomass (Cmic) and soil C content (soil C), and C losses: litter decomposition (LD), heterotrophic respiration (Rh), root respiration (Rr) and soil CO<sub>2</sub> efflux (SCE).

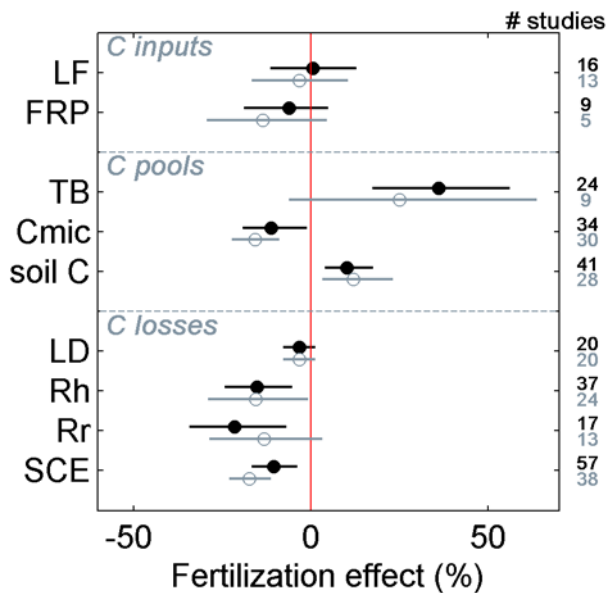

## 5. References

- 1 Rosenberg, M. S., Adams, D. C., and Gurevitch, J., *Metawin: Statistical Software for Meta-Analysis*. (Sinauer Associates, Inc. Sunderland, Massachusetts, 2000).
- 2 Hedges, L. V., Gurevitch, J., and Curtis, P. S. The meta-analysis of response ratios in experimental ecology. *Ecology* **80**, 1150-1156 (1999).
- 3 Adams, D. C., Gurevitch, J., and Rosenberg, M. S. Resampling tests for meta-analysis of ecological data. *Ecology* **78**, 1277-1283 (1997).
- 4 Luysaert, S. et al. CO<sub>2</sub>-balance of boreal, temperate and tropical forest derived from a global database. *Global Change Biology* **13**, 2509-2537 (2007).
- 5 Galloway, J. N. et al. Nitrogen cycles: past, present, and future. *Biogeochemistry* **70**, 153-226 (2004).
- 6 Holland, E. A., Braswell, B. H., Sulzman, J., and Lamarque, J. F. Nitrogen deposition onto the United States and western Europe: Synthesis of observations and models. *Ecological Applications* **15**, 38-57 (2005).
- 7 Dentener, F. J., (Oak Ridge National Laboratory Distributed Active Archive Center, Oak Ridge, Tennessee, U.S.A., 2006).
- 8 Oren, R. A. M. et al. Estimating the uncertainty in annual net ecosystem carbon exchange: spatial variation in turbulent fluxes and sampling errors in eddy-covariance measurements. *Global Change Biology* **12**, 883-896 (2006).
- 9 Richardson, A. D. et al. A multi-site analysis of random error in tower-based measurements of carbon and energy fluxes. *Agricultural And Forest Meteorology* **136**, 1-18 (2006).
- 10 Papale, D. et al. Towards a standardized processing of Net Ecosystem Exchange measured with eddy covariance technique: algorithms and uncertainty estimation. *Biogeosciences* **3**, 571-583 (2006).
- 11 Moffat, A. J. et al. Comprehensive comparison of gap-filling techniques for eddy covariance net carbon fluxes. *Agricultural and Forest Meteorology* **147**, 209-232 (2007).
- 12 Taylor, B. N. and Kuyatt, C. E., 1994.
- 13 Rubinstein, R. Y., *Simulation and the Monte Carlo Method*. (John Wiley & Sons, New York, 1981).
- 14 Kaspari, M. et al. Multiple nutrients limit litterfall and decomposition in a tropical forest. *Ecology Letters* **11**, 35-43 (2008).
- 15 Downs, M. R., Nadelhoffer, K. J., Melillo, J. M., and Aber, J. D. Immobilization of a N-15-labeled nitrate addition by decomposing forest litter. *Oecologia* **105**, 141-150 (1996).
- 16 Spinnler, D., Egh, P., and Körner, C. Four-year growth dynamics of beech-spruce model ecosystems under CO<sub>2</sub> enrichment on two different forest soils. *Trees-Structure and Function* **16**, 423-436 (2002).
- 17 Hagedorn, F. et al. Carbon sequestration in forest soils: effects of soil type, atmospheric CO<sub>2</sub> enrichment, and N deposition. *European Journal of Soil Science* **52**, 619-628 (2001).
- 18 Haynes, B. E. and Gower, S. T. Belowground carbon allocation in unfertilized and fertilized red pine plantations in Northern Wisconsin. *Tree Physiology* **15**, 317-325 (1995).

- 19 Allison, S. D., Czimczik, C. I., and Treseder, K. K. Microbial activity and soil respiration  
under nitrogen addition in Alaskan boreal forest. *Global Change Biology* **14**, 1156-1168  
(2008).
- 20 Keeler, B. L., Hobbie, S. E., and Kellogg, L. E. Effects of Long-Term Nitrogen Addition  
on Microbial Enzyme Activity in Eight Forested and Grassland Sites: Implications for  
Litter and Soil Organic Matter Decomposition. *Ecosystems* **12**, 1-15 (2009).
- 21 Mo, J. M. et al. Response of soil respiration to simulated N deposition in a disturbed and  
a rehabilitated tropical forest in southern China. *Plant and Soil* **296**, 125-135 (2007).
- 22 Mo, J. M., Li, D. J., and Gundersen, P. Seedling growth response of two tropical tree  
species to nitrogen deposition in southern China. *European Journal of Forest Research*  
**127**, 275-283 (2008).
- 23 Mo, J. M. et al. Response of nutrient dynamics of decomposing pine (*Pinus massoniana*)  
needles to simulated N deposition in a disturbed and a rehabilitated forest in tropical  
China. *Ecological Research* **22**, 649-658 (2007).
- 24 Mo, J. M. et al. Decomposition responses of pine (*Pinus massoniana*) needles with two  
different nutrient-status to N deposition in a tropical pine plantation in southern China.  
*Annals of Forest Science* **65** (2008).
- 25 Gnankambary, Z., Stedt, U., Nyberg, G., Hien, V., and Malmer, A. Nitrogen and  
phosphorus limitation of soil microbial respiration in two tropical agroforestry parklands  
in the south-Sudanese zone of Burkina Faso: The effects of tree canopy and fertilization.  
*Soil Biology & Biochemistry* **40**, 350-359 (2008).
- 26 Gallardo, A. and Schlesinger, W. H. Factors limiting microbial biomass in the mineral  
soil and forest floor of a warm-temperate forest. *Soil Biology & Biochemistry* **26**, 1409-  
1415 (1994).
- 27 Billings, S. A. and Ziegler, S. E. Altered patterns of soil carbon substrate usage and  
heterotrophic respiration in a pine forest with elevated CO<sub>2</sub> and N fertilization. *Global  
Change Biology* **14**, 1025-1036 (2008).
- 28 Drake, J. E., Stoy, P. C., Jackson, R. B., and DeLucia, E. H. Fine-root respiration in a  
loblolly pine (*Pinus taeda* L.) forest exposed to elevated CO<sub>2</sub> and N fertilization. *Plant  
Cell and Environment* **31**, 1663-1672 (2008).
- 29 Liberloo, M. et al. Elevated CO<sub>2</sub> concentration, fertilization and their interaction: growth  
stimulation in a short-rotation poplar coppice (EUROFACE). *Tree Physiology* **25**, 179-  
189 (2005).
- 30 Moscatelli, M. C. et al. Mediterranean natural forest living at elevated carbon dioxide:  
soil biological properties and plant biomass growth. *Soil Use and Management* **17**, 195-  
202 (2001).
- 31 Liberloo, M. et al. Woody biomass production during the second rotation of a bio-energy  
*Populus* plantation increases in a future high CO<sub>2</sub> world. *Global Change Biology* **12**,  
1094-1106 (2006).
- 32 Leggett, Z. H. and Kelting, D. L. Fertilization effects on carbon pools in loblolly pine  
plantations on two upland sites. *Soil Science Society of America Journal* **70**, 279-286  
(2006).
- 33 Iivonen, S., Kaakinen, S., Jolkkonen, A., Vapaavuori, E., and Linder, S. Influence of  
long-term nutrient optimization on biomass, carbon, and nitrogen acquisition and  
allocation in Norway spruce. *Canadian Journal of Forest Research-Revue Canadienne  
De Recherche Forestiere* **36**, 1563-1571 (2006).

- 34 Olsson, P., Linder, S., Giesler, R., and Hogberg, P. Fertilization of boreal forest reduces  
both autotrophic and heterotrophic soil respiration. *Global Change Biology* **11**, 1745-  
1753 (2005).
- 35 Jarvis, P. G., *European Forests and Global Change. The Likely Impacts of Rising CO<sub>2</sub>*  
*and Temperature*. (Cambridge University Press, Cambridge, 1998).
- 36 Temperton, V., PhD thesis, University of Edinburgh, 1998.
- 37 Cleveland, C. C. and Townsend, A. R. Nutrient additions to a tropical rain forest drive  
substantial soil carbon dioxide losses to the atmosphere. *Proceedings of the National*  
*Academy of Sciences of the United States of America* **103**, 10316-10321 (2006).
- 38 Magill, A. H. et al. Ecosystem response to 15 years of chronic nitrogen additions at the  
Harvard Forest LTER, Massachusetts, USA. *Forest Ecology and Management* **196**, 7-28  
(2004).
- 39 Micks, P., Downs, M. R., Magill, A. H., Nadelhoffer, K. J., and Aber, J. D. Decomposing  
litter as a sink for N-15-enriched additions to an oak forest and a red pine plantation.  
*Forest Ecology and Management* **196**, 71-87 (2004).
- 40 Bowden, R. D., Davidson, E., Savage, K., Arabia, C., and Steudler, P. Chronic nitrogen  
additions reduce total soil respiration and microbial respiration in temperate forest soils at  
the Harvard Forest. *Forest Ecology and Management* **196**, 43-56 (2004).
- 41 Smolander, A., Barnette, L., Kitunen, V., and Lumme, I. N and C transformations in  
long-term N-fertilized forest soils in response to seasonal drought. *Applied Soil Ecology*  
**29**, 225-235 (2005).
- 42 Phillips, R. P. and Fahey, T. J. Fertilization effects on fineroot biomass, rhizosphere  
microbes and respiratory fluxes in hardwood forest soils. *New Phytologist* **176**, 655-664  
(2007).
- 43 Zhao, C. Z. and Liu, Q. Growth and physiological responses of *Picea asperata* seedlings  
to elevated temperature and to nitrogen fertilization. *Acta Physiologiae Plantarum* **31**,  
163-173 (2009).
- 44 Burton, A. J., Pregitzer, K. S., Crawford, J. N., Zogg, G. P., and Zak, D. R. Simulated  
chronic NO<sub>3</sub><sup>-</sup> deposition reduces soil respiration in northern hardwood forests. *Global*  
*Change Biology* **10**, 1080-1091 (2004).
- 45 Pregitzer, K. S., Burton, A. J., King, J. S., and Zak, D. R. Soil respiration, root biomass,  
and root turnover following long-term exposure of northern forests to elevated  
atmospheric CO<sub>2</sub> and tropospheric O<sub>3</sub>. *New Phytologist* **180**, 153-161 (2008).
- 46 Franklin, O., Högberg, P., Ekblad, A., and Ågren, G. I. Pine forest floor carbon  
accumulation in response to N and PK additions: Bomb C-14 modelling and respiration  
studies. *Ecosystems* **6**, 644-658 (2003).
- 47 Kim, C. Soil carbon storage, litterfall and CO<sub>2</sub> efflux in fertilized and unfertilized larch  
(*Larix leptolepis*) plantations. *Ecological Research* **23**, 757-763 (2008).
- 48 Lee, K. H. and Jose, S. Soil respiration, fine root production, and microbial biomass in  
cottonwood and loblolly pine plantations along a nitrogen fertilization gradient. *Forest*  
*Ecology and Management* **185**, 263-273 (2003).
- 49 Maier, C. A. and Kress, L. W. Soil CO<sub>2</sub> evolution and root respiration in 11 year-old  
loblolly pine (*Pinus taeda*) plantations as affected by moisture and nutrient availability.  
*Canadian Journal of Forest Research-Revue Canadienne De Recherche Forestiere* **30**,  
347-359 (2000).



- 50 Lussenhop, J., Treonis, A., Curtis, P. S., Teeri, J. A., and Vogel, C. S. Response of soil  
biota to elevated atmospheric CO<sub>2</sub> in poplar model systems. *Oecologia* **113**, 247-251  
(1998).
- 51 Pregitzer, K. S. et al. Atmospheric CO<sub>2</sub>, Soil-Nitrogen and Turnover of Fine Roots. *New*  
*Phytologist* **129**, 579-585 (1995).
- 52 Mikan, C. J., Zak, D. R., Kubiske, M. E., and Pregitzer, K. S. Combined effects of  
atmospheric CO<sub>2</sub> and N availability on the belowground carbon and nitrogen dynamics of  
aspen mesocosms. *Oecologia* **124**, 432-445 (2000).
- 53 King, J. S. et al. Chemistry and decomposition of litter from *Populus tremuloides*  
Michaux grown at elevated atmospheric CO<sub>2</sub> and varying N availability. *Global Change*  
*Biology* **7**, 65-74 (2001).
- 54 Johnson, D. et al. Soil p(CO<sub>2</sub>), Soil Respiration, and Root Activity in CO<sub>2</sub>-Fumigated and  
Nitrogen-Fertilized Ponderosa Pine. *Plant and Soil* **165**, 129-138 (1994).
- 55 Johnson, D. W., Cheng, W., and Ball, J. T. Effects of [CO<sub>2</sub>] and nitrogen fertilization on  
soils planted with ponderosa pine. *Plant and Soil* **224**, 99-113 (2000).
- 56 Tyree, M. C., Seiler, J. R., Aust, W. M., Sampson, D. A., and Fox, T. R. Long-term  
effects of site preparation and fertilization on total soil CO<sub>2</sub> efflux and heterotrophic  
respiration in a 33-year-old *Pinus taeda* L. plantation on the wet flats of the Virginia  
Lower Coastal Plain. *Forest Ecology and Management* **234**, 363-369 (2006).
- 57 Bond-Lamberty, B., Wang, C., and Gower, S. T. Net primary production and net  
ecosystem production of a boreal black spruce wildfire chronosequence. *Global Change*  
*Biology* **10**, 473-487 (2004).
- 58 Kutsch, W. et al., in *Ecosystem Approaches to Landscape Management in Central*  
*Europe*, edited by J. Tenhunen (Springer-Verlag, Berlin Heidelberg, 2001), Vol. 147, pp.  
75-95.
- 59 Bascietto, M. et al., (2003).
- 60 Schulze, E.-D., in *Carbon and nitrogen cycling in European forest ecosystems*, edited by  
E.-D. Schulz (Springer, Berlin, 2000), Vol. 142, pp. 500.
- 61 Ohtsuka, T. et al. Biometric based estimates of net primary production (NPP) in a cool-  
temperate deciduous forest stand beneath a flux tower. *Agricultural And Forest*  
*Meteorology* **134**, 27-38 (2005).
- 62 Ito, A., Saigusa, N., Murayama, S., and Yamamoto, S. Modeling of gross and net carbon  
dioxide exchange over a cool-temperate deciduous broad-leaved forest in Japan: Analysis  
of seasonal and interannual change. *Agricultural And Forest Meteorology* **134**, 122-134  
(2005).
- 63 Lloyd, J. O. N. et al. Seasonal and annual variations in the photosynthetic productivity  
and carbon balance of a central Siberian pine forest. *Tellus B* **54**, 590-610 (2002).
- 64 Eliasson, P. E. et al. The response of heterotrophic CO<sub>2</sub> flux to soil warming. *Global*  
*Change Biology* **11**, 167-181 (2005).
- 65 Olson, R. J., Scurlock, J. M. O., Prince, S. D., Zheng, D. L., and Johnson, K. R., (Oak  
Ridge National Laboratory Distributed Active Archive Center, Oak Ridge, Tennessee,  
U.S.A., 2001).
- 66 Curtis, P. S. et al. Biometric and eddy-covariance based estimates of annual carbon  
storage in five eastern North American deciduous forests. *Agricultural and Forest*  
*Meteorology* **113**, 3-19 (2002).



- <sup>67</sup> Gough, C. M., Vogel, C. S., Harrold, K. H., George, K., and Curtis, P. S. The legacy of harvest and fire on ecosystem carbon storage in a north temperate forest. *Global Change Biology* **13**, 1935-1949 (2007).
